# Supplementary material for: Anticancer effects of the HDAC inhibitor, 3β,6β‑dihydroxyurs‑12‑en‑27‑oic acid, in MCF‑7 breast cancer cells via the inhibition of Akt/mTOR pathways
Source: PubMed Central journal article supplement — Oncol Rep. 2023 Jan 12;49(2):43. doi: 10.3892/or.2023.8480 (PMC9868892; doi:10.3892/or.2023.8480), 2023-01-12

Figure S1. Cytotoxic effect of ACT-3 (0, 2, 3, 6, 13, 25 and 50  $\mu\text{M}$ ) against NRK-52E and MDA-MB-231 cells at 24 and 48 h of incubation. \* $P < 0.05$  and \*\* $P < 0.01$ . ACT-3, 3 $\beta$ , 6 $\beta$ -dihydroxyurs-12-en-27-oic acid.

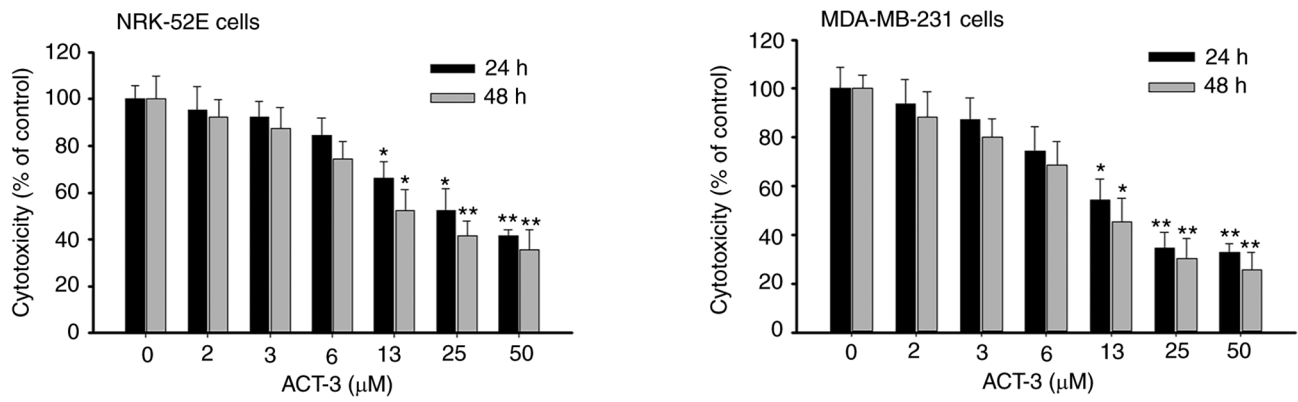

Supplement: Supplementary_Data.pdf [file Supplementary_Data.pdf]
